# Supplementary material for: Substrate Type and Concentration Differently Affect Colon Cancer Cells Ultrastructural Morphology, EMT Markers, and Matrix Degrading Enzymes
Source: MDPI journal article supplement (doi:10.3390/biom12121786), 2022-11-30
Supplement: s1 [file s1]

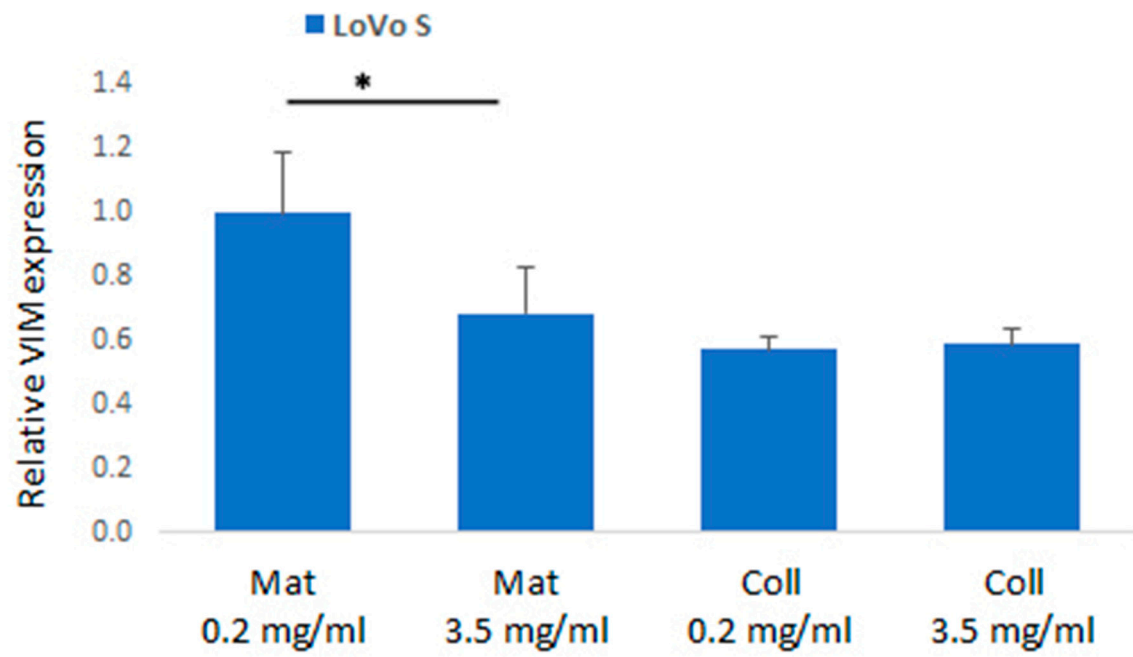

**Figure S1.** Evaluation of VIM expression in LoVo-S cells. VIM expression decreases from standard Matrigel (0.2 mg/mL) to both different concentrations of collagen. \*  $p \leq 0.05$ .
